# Supplementary material for: Development of a Conceptual Model of Physical Functioning Limitations Experienced by Patients with Late-Stage Chronic Kidney Disease: A Qualitative Interview Study
Source: Springer Nature journal article supplement (doi:10.1007/s12325-024-02853-6), 2024-05-09
Supplement: MOESM1 [file 27072420]

## Supplementary Materials

Development of a Conceptual Model of Physical Functioning Limitations Experienced by Patients with Late-Stage Chronic Kidney Disease: A Qualitative Interview Study

**Authors:** Ewelina Palmer<sup>1\*</sup> · Ichha Johar<sup>2</sup> · Dustin J. Little<sup>3</sup> · Niklas Karlsson<sup>4</sup>

**Affiliations:** <sup>1</sup>Patient Centred Science, Biopharmaceuticals R&D, AstraZeneca, Cambridge, UK. <sup>2</sup>Patient-Centred Solutions, IQVIA, London, UK. <sup>3</sup>Late CVRM, Biopharmaceuticals R&D, AstraZeneca, Gaithersburg, MD, USA. <sup>4</sup>Patient Centred Science, BioPharmaceuticals R&D, AstraZeneca, Gothenburg, Sweden.

**Corresponding author:** Ewelina Palmer; Patient Centred Science, Biopharmaceuticals R&D, AstraZeneca, Cambridge, UK; [ewelina.palmer@astrazeneca.com](mailto:ewelina.palmer@astrazeneca.com)

**Supplementary Materials Table S1.** Eligibility criteria for qualitative patient interviews

| Inclusion criteria                                                        | Exclusion criteria                                                                                                                                                                                                                                |
|---------------------------------------------------------------------------|---------------------------------------------------------------------------------------------------------------------------------------------------------------------------------------------------------------------------------------------------|
| Diagnosis of CKD stage IV or V                                            | Diagnosed with:                                                                                                                                                                                                                                   |
| > 18 years of age                                                         | <ul style="list-style-type: none"> <li>• New York Heart Association class III/IV heart failure</li> </ul>                                                                                                                                         |
| Resides in the USA (excluding Puerto Rico)                                | <ul style="list-style-type: none"> <li>• pulmonary diseases</li> </ul>                                                                                                                                                                            |
| Speaks English                                                            | <ul style="list-style-type: none"> <li>• type 2 diabetes</li> </ul>                                                                                                                                                                               |
| Willing and able to electronically sign an informed consent form          | <ul style="list-style-type: none"> <li>• presence of an active malignancy</li> <li>• neurological events or a mental condition causing the patient to be unable to understand the nature, scope and possible consequences of the study</li> </ul> |
| Has access to a telephone or cell phone or an internet-connected computer | <ul style="list-style-type: none"> <li>• musculoskeletal diseases that significantly limit the patient's functional status</li> </ul>                                                                                                             |
|                                                                           | BMI < 18.5 kg/m <sup>2</sup> or ≥ 40 kg/m <sup>2</sup>                                                                                                                                                                                            |
|                                                                           | Received dialysis within the past 90 days                                                                                                                                                                                                         |
|                                                                           | Been hospitalized for any reason within 6 weeks before participation                                                                                                                                                                              |

Patients receiving dialysis and/or with comorbidities such as diabetes were excluded from this study because they may experience additional barriers to physical functioning compared with patients not receiving dialysis or without such comorbidities.

*BMI* body mass index, *CKD* chronic kidney disease

**Supplementary Materials Table S2.** Frequency of mentions of concepts related to physical functioning limitations in patients with CKD stages IIIa–IV from a TLR and previous patient interviews

| Concept                                                      | Number of mentions    |                             |
|--------------------------------------------------------------|-----------------------|-----------------------------|
|                                                              | Interview transcripts | Targeted literature reviews |
| <b>Symptoms</b>                                              |                       |                             |
| Tiredness/lack of energy/lack of strength/feeling weak       | 8                     | 6                           |
| Generalized oedema/swelling                                  | 10                    | 1                           |
| Muscle weakness/cramps                                       | 7                     | 2                           |
| Shortness of breath                                          | 6                     | 2                           |
| Pain                                                         | 2                     | 4                           |
| Nocturia                                                     | 3                     | 0                           |
| Impact on sleep (amount, quality, difficulty falling asleep) | 6                     | 1                           |
| <b>Physical activity limitations</b>                         |                       |                             |
| Sedentary/no activity                                        | 1                     | 0                           |
| Reduced physical activity                                    | 1                     | 1                           |
| Walking limitation                                           | 2                     | 0                           |
| <b>Participation restrictions</b>                            |                       |                             |
| Confined to home                                             | 2                     | 0                           |
| Impact on household tasks                                    | 1                     | 1                           |
| Impact on sports/leisure activities                          | 2                     | 1                           |
| Impact on self-care activities of daily living               | 1                     | 2                           |

*CKD* chronic kidney disease, *TLR* targeted literature review

**Supplementary Materials Fig. S1.** Preliminary conceptual model summarizing physical function limitations in patients with mid-to-late stage CKD. Concepts were identified from a targeted literature review for patients with CKD stages IV–V and previous interviews with patients with CKD stages IIIa–IIIb. *CKD* chronic kidney disease

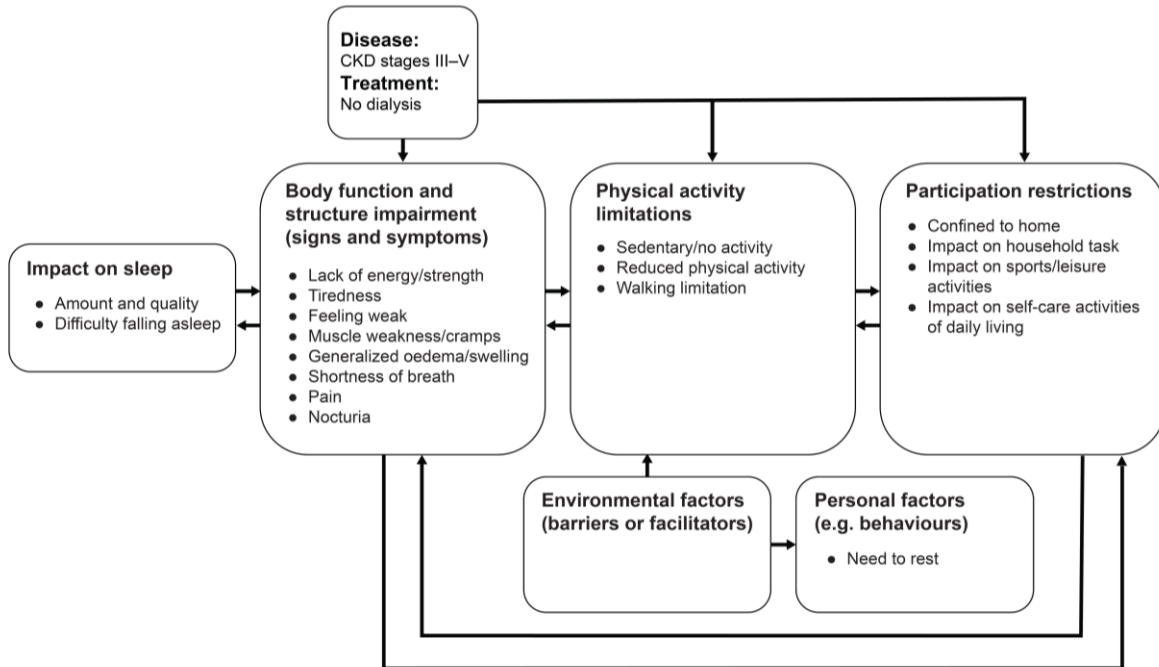

**Supplementary Materials Table S3.** Concepts related to physical functioning limitations reported by patients during concept elicitation interviews

| <b>Concept</b>                                         | <b>Total patients, n (%)</b><br><b>(n = 23)<sup>a</sup></b> |
|--------------------------------------------------------|-------------------------------------------------------------|
| Walking up and down stairs                             | 19 (83)                                                     |
| Walking (distance)                                     | 17 (74)                                                     |
| Walking (speed)                                        | 16 (70)                                                     |
| Lifting items/picking things up                        | 14 (61)                                                     |
| Standing up for long durations                         | 11 (48)                                                     |
| Bending down/bending over                              | 6 (26)                                                      |
| Unable to walk                                         | 6 (26)                                                      |
| Walking up incline                                     | 5 (22)                                                      |
| Unable to sit/lie in one position for extended periods | 5 (22)                                                      |
| Walking (duration)                                     | 4 (17)                                                      |
| Performing physical activity for long durations        | 4 (17)                                                      |
| Lifting arms above head                                | 3 (13)                                                      |
| Difficulty with balance (due to oedema)                | 2 (9)                                                       |

<sup>a</sup>The n values are the number of patients who reported physical impacts

**Supplementary Materials Table S4.** Concepts reported by patients during concept elicitation interviews

| <b>Concept</b>                                                                          | <b>Total patients, n (%)</b><br><b>(n = 23)<sup>a</sup></b> |
|-----------------------------------------------------------------------------------------|-------------------------------------------------------------|
| <b>Behavioural impact</b>                                                               |                                                             |
| Need to rest/subsequent periods of rest                                                 | 23 (100)                                                    |
| Participation in fewer activities                                                       | 21 (91)                                                     |
| Reduced frequency of activity                                                           | 15 (65)                                                     |
| Modification in planning activity/modifies plan                                         | 15 (65)                                                     |
| Avoid lifting heavy items                                                               | 13 (56)                                                     |
| Reduced pace of activity                                                                | 13 (56)                                                     |
| Modification of diet to alleviate symptoms/improve health                               | 10 (43)                                                     |
| Avoid walking places                                                                    | 9 (39)                                                      |
| Complete fewer active tasks in a day                                                    | 8 (35)                                                      |
| Avoid activity                                                                          | 7 (30)                                                      |
| Need to move/get up/change position                                                     | 6 (26)                                                      |
| Avoid sudden movements                                                                  | 4 (17)                                                      |
| Avoid strenuous activity                                                                | 4 (17)                                                      |
| Isolate oneself                                                                         | 3 (13)                                                      |
| Stop activity                                                                           | 2 (9)                                                       |
| <b>Total patients, n (%)</b><br><b>(n = 23)<sup>a</sup></b>                             |                                                             |
| Avoidance/care during activities due to concern of falling/discomfort from swollen feet | 2 (9)                                                       |
| Avoid repetitive lifting                                                                | 1 (4)                                                       |
| Increased exercise for prevention of decline/improvement in health                      | 1 (4)                                                       |
| <b>Activity participation restrictions</b>                                              |                                                             |
| Reduced ability to handle household tasks                                               | 22 (96)                                                     |
| Reduced social activities/social life                                                   | 18 (78)                                                     |

|                                         |         |
|-----------------------------------------|---------|
| Reduced sports/leisure activities       | 17 (74) |
| Reduced job/work routine efficiency     | 16 (70) |
| Reduced ability to perform exercise/gym | 16 (70) |
| Difficulty shopping                     | 13 (56) |
| Difficulty with bathing/self-care       | 8 (35)  |
| Reduced travelling                      | 8 (35)  |
| Reduced family role                     | 7 (30)  |
| Confined to home                        | 5 (22)  |
| Unable to fit into clothes/shoes        | 4 (17)  |
| Difficulty driving                      | 4 (17)  |
| Difficulty getting out of bed           | 3 (13)  |
| Reduced sexual activities               | 3 (13)  |

---

**Symptoms**

|                                                                                      |          |
|--------------------------------------------------------------------------------------|----------|
| Lack of energy/tiredness/fatigue                                                     | 23 (100) |
| Muscular difficulties/lack of strength                                               | 19 (83)  |
| Pain                                                                                 | 16 (70)  |
| Shortness of breath                                                                  | 16 (70)  |
| Increased urination                                                                  | 13 (56)  |
| Oedema/swelling                                                                      | 13 (56)  |
| General (including dizziness, light-headedness, vomiting, nausea, itchy skin, fever) | 13 (56)  |

---

|                |                                                             |
|----------------|-------------------------------------------------------------|
| <b>Concept</b> | <b>Total patients, n (%)</b><br><b>(n = 23)<sup>a</sup></b> |
|----------------|-------------------------------------------------------------|

---

**Impact on sleep**

|                               |         |
|-------------------------------|---------|
| Poor/reduced quality of sleep | 15 (65) |
| Difficulty falling asleep     | 8 (35)  |
| Waking up during the night    | 6 (26)  |

---

**Emotional functioning**

|            |        |
|------------|--------|
| Frustrated | 8 (35) |
|------------|--------|

|                                 |        |
|---------------------------------|--------|
| Embarrassed                     | 5 (22) |
| Depressed                       | 3 (13) |
| Feeling like a burden on family | 3 (13) |

---

<sup>a</sup>The n values are the number of patients who reported physical impacts



**Supplementary Materials Fig. S2.** Patients' perceived overall impact on their lives from CKD-related physical limitations. Twenty-two patients provided scores between 0 (not impacted at all) and 10 (extremely impacted). *CKD* chronic kidney disease

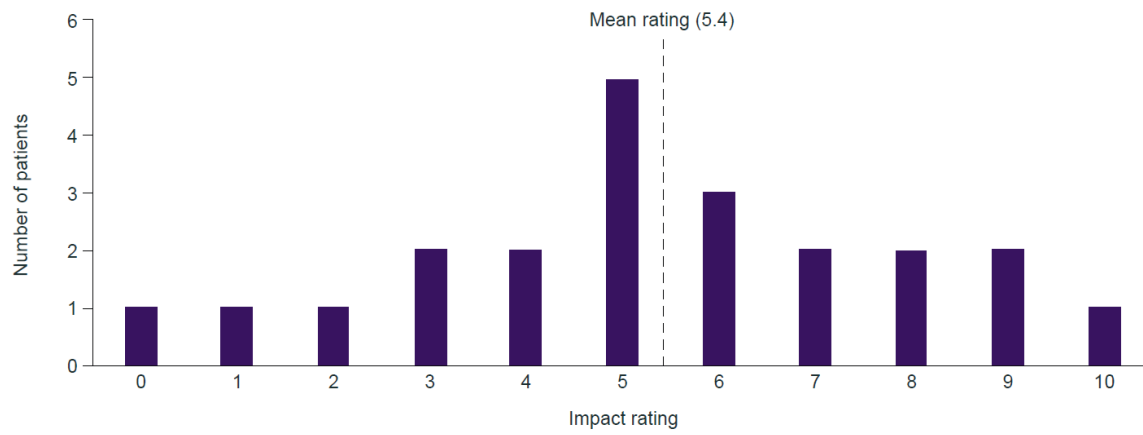

**Supplementary Materials Table S5.** Symptoms reported by patients as important for therapies to alleviate

| <b>Symptom</b>                   | <b>Total patients,<br/>n (%)<br/>(<i>n</i> = 17)</b> |
|----------------------------------|------------------------------------------------------|
| Fatigue/lack of energy           | 10 (59)                                              |
| Shortness of breath              | 4 (24)                                               |
| Lack of stamina/endurance        | 4 (24)                                               |
| Oedema/swelling                  | 3 (18)                                               |
| Increased frequency of urination | 2 (12)                                               |
| Lack of strength/feeling weak    | 2 (12)                                               |
| Pain                             | 2 (12)                                               |
| Enlarged abdomen/kidney          | 2 (12)                                               |
| Dizziness                        | 1 (6)                                                |

**Supplementary Materials Table S6.** Physical activities patients would most want improved if their symptoms were alleviated through a new treatment

| <b>Physical activity</b>   | <b>Total patients,<br/>n (%)<br/>(<i>n</i> = 16)</b> |
|----------------------------|------------------------------------------------------|
| Walking                    | 6 (38)                                               |
| Sports/exercise            | 5 (31)                                               |
| Household tasks            | 5 (31)                                               |
| Work/voluntary work        | 5 (31)                                               |
| Travelling                 | 3 (19)                                               |
| Shopping                   | 2 (13)                                               |
| Family role                | 1 (6)                                                |
| Walking up and down stairs | 1 (6)                                                |
